# Supplementary material for: Outcome Prediction of Covert Hepatic Encephalopathy in Liver Cirrhosis: Comparison of Four Testing Strategies
Source: PubMed Central journal article supplement — Clin Transl Gastroenterol. 2020 Jun 2;11(6):e00172. doi: 10.14309/ctg.0000000000000172 (PMC7339190; doi:10.14309/ctg.0000000000000172), 2020-06-02

**Supplementary Figures**

**Supplementary Figure 1. Impact of pathological results of (A) PHES, (B) CFF, (C) S-ANT1 and (D) CCHE score on risk for death/need for liver transplantation in patient with liver cirrhosis.**

(A)

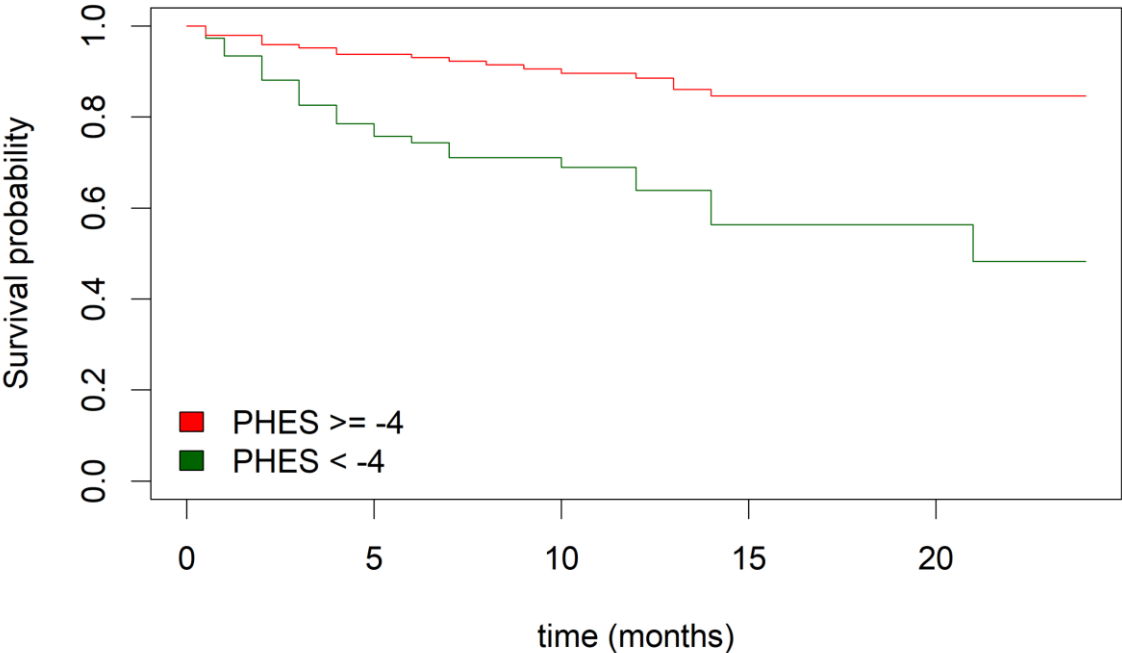

(B)

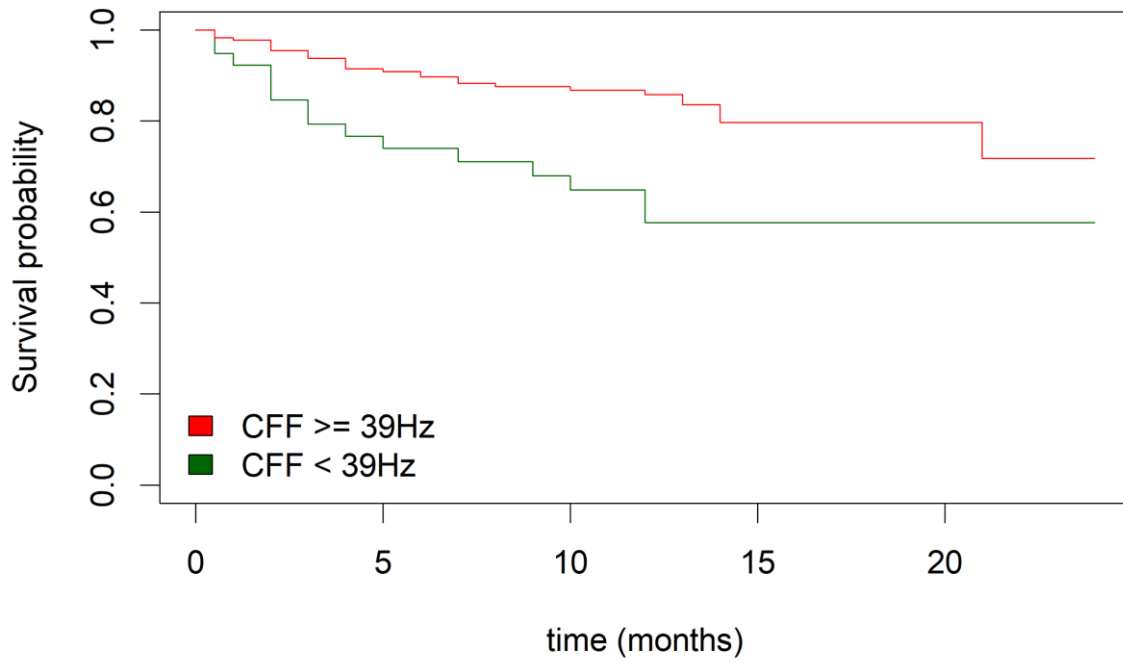

(C)

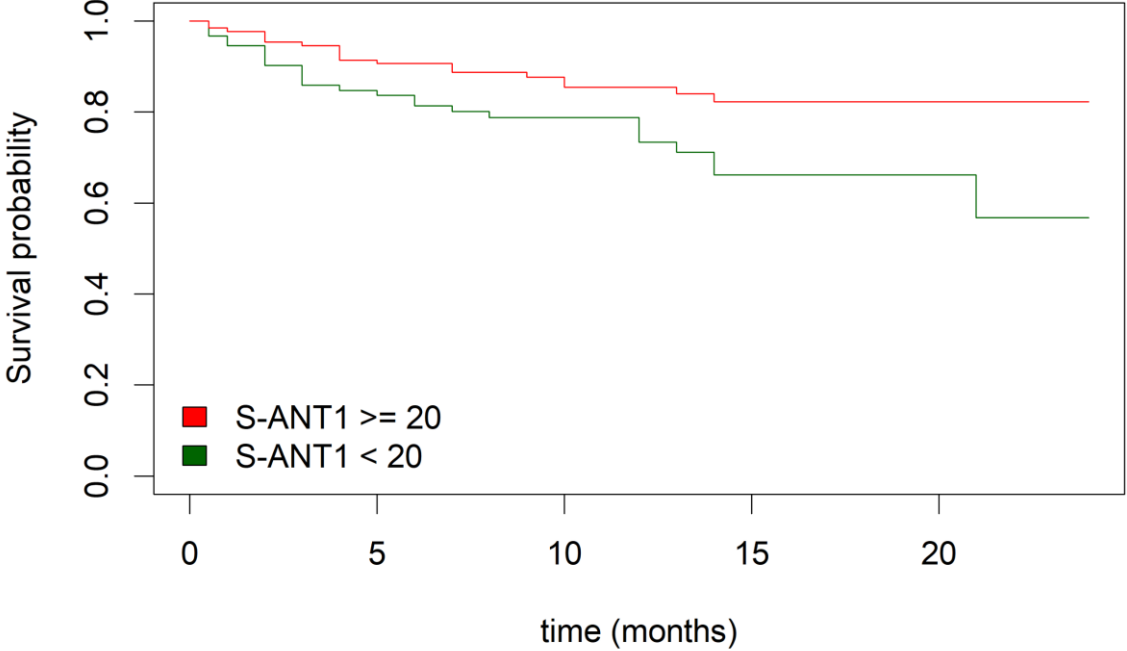

(D)

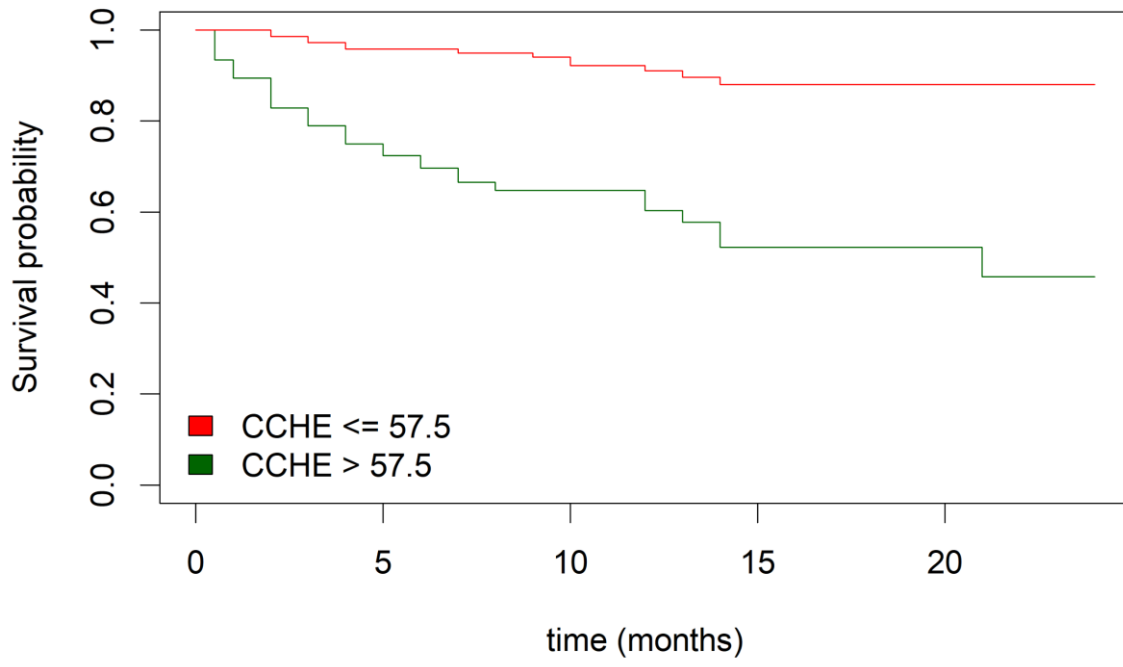

Supplement: ct9-11-e00172-s001.pdf [file ct9-11-e00172-s001.pdf]
